# Supplementary material for: Efficacy and Safety of Dupilumab Maintained in Adults ≥ 60 Years of Age with Moderate-to-Severe Atopic Dermatitis: Analysis of Pooled Data from Four Randomized Clinical Trials
Source: PubMed Central journal article supplement — Am J Clin Dermatol. 2023 Feb 20;24(3):469–83. doi: 10.1007/s40257-022-00754-4 (PMC10195762; doi:10.1007/s40257-022-00754-4), 2023-02-20
Supplement: 40257_2022_754_MOESM1_ESM.pdf [file 40257_2022_754_MOESM1_ESM.pdf]

**Online Resource**

**American Journal of Clinical Dermatology**

**Efficacy and Safety of Dupilumab Maintained in Adults  $\geq$  60 Years of Age with Moderate-to-Severe Atopic Dermatitis: Analysis of Pooled Data from Four Randomized Clinical Trials**

Jonathan I. Silverberg · Charles W. Lynde · Katrina Abuabara · Cataldo Patrino · Anna De Benedetto · Haixin Zhang · Ryan B. Thomas · Gaëlle Bégo-Le-Bagousse · Faisal A. Khokhar · Jignesh Vakil · Ainara Rodríguez Marco · Noah A. Levit

**Corresponding author:**

Noah Levit, Regeneron Pharmaceuticals, Inc., Tarrytown, NY, USA; [noah.levit@regeneron.com](mailto:noah.levit@regeneron.com)

**Fig. S1** Baseline biomarker levels. *IU* international units, *mL* milliliter, *pg* picograms.

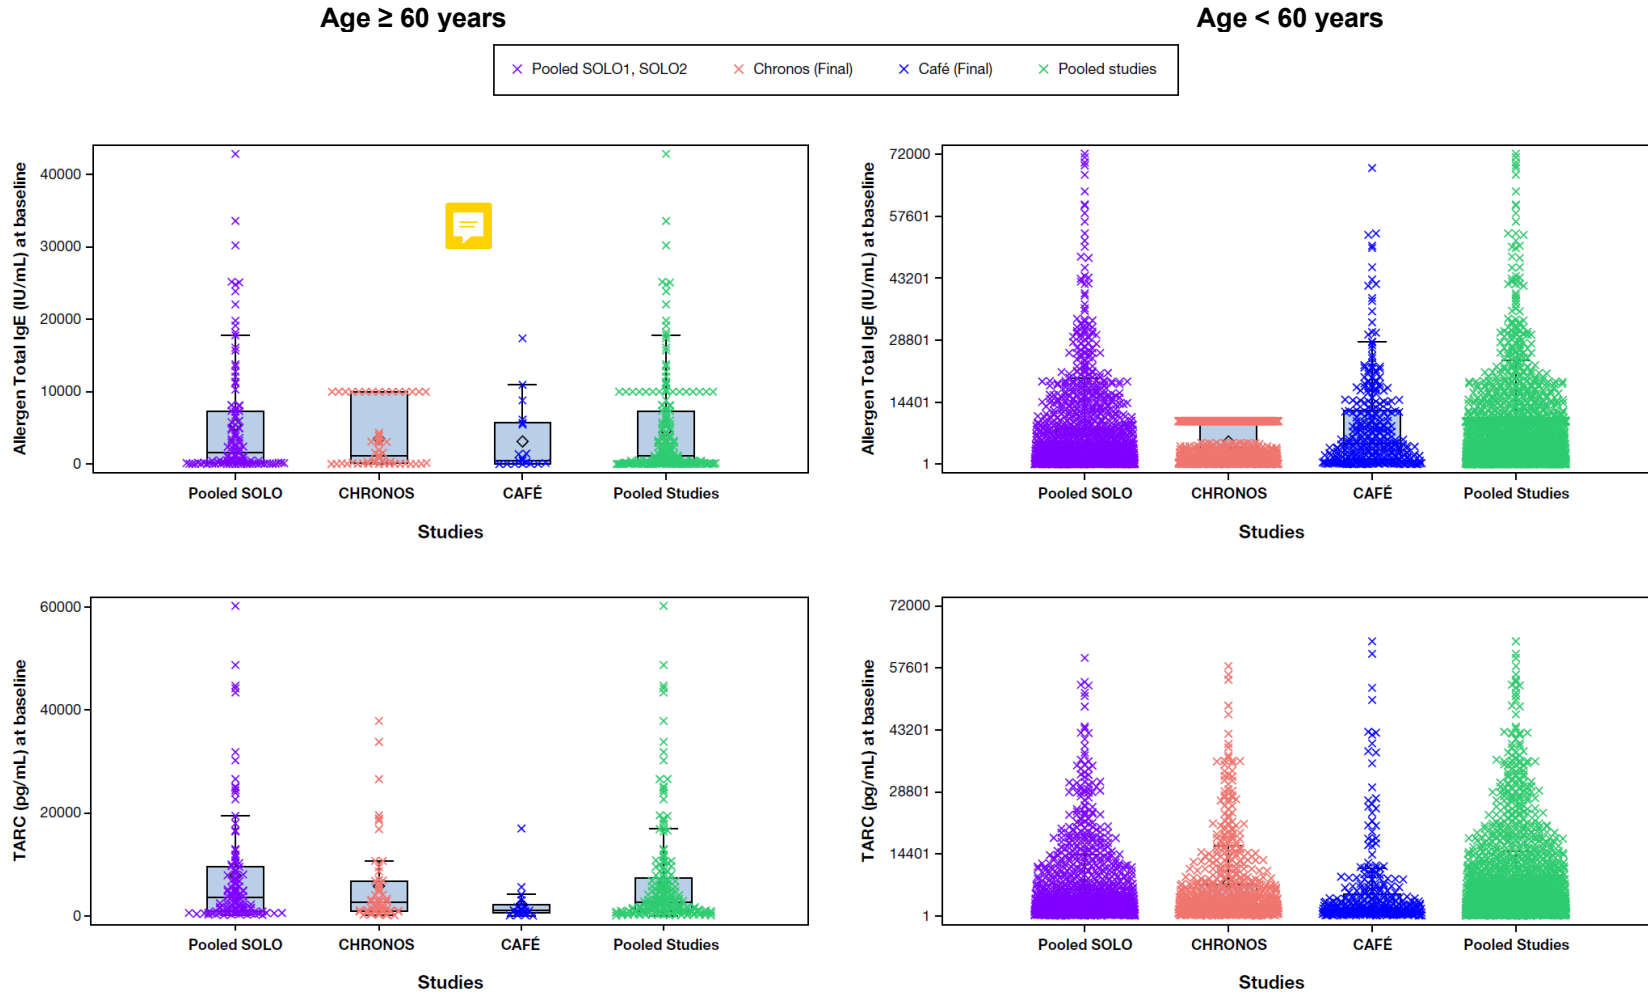

**Fig. S2** LS mean change from baseline in TARC. Patients aged < 60 years treated with dupilumab 300 mg qw or q2w achieved a greater LS mean change from baseline in TARC from week 2 through week 16 vs placebo ( $P < 0.0001$ ). Patients aged  $\geq 60$  years treated with dupilumab 300 mg qw or q2w achieved a greater LS mean change from baseline in TARC from week 2 through week 16 vs placebo ( $P < 0.05$ ), and with dupilumab qw at week 16 vs placebo ( $P < 0.001$ ).

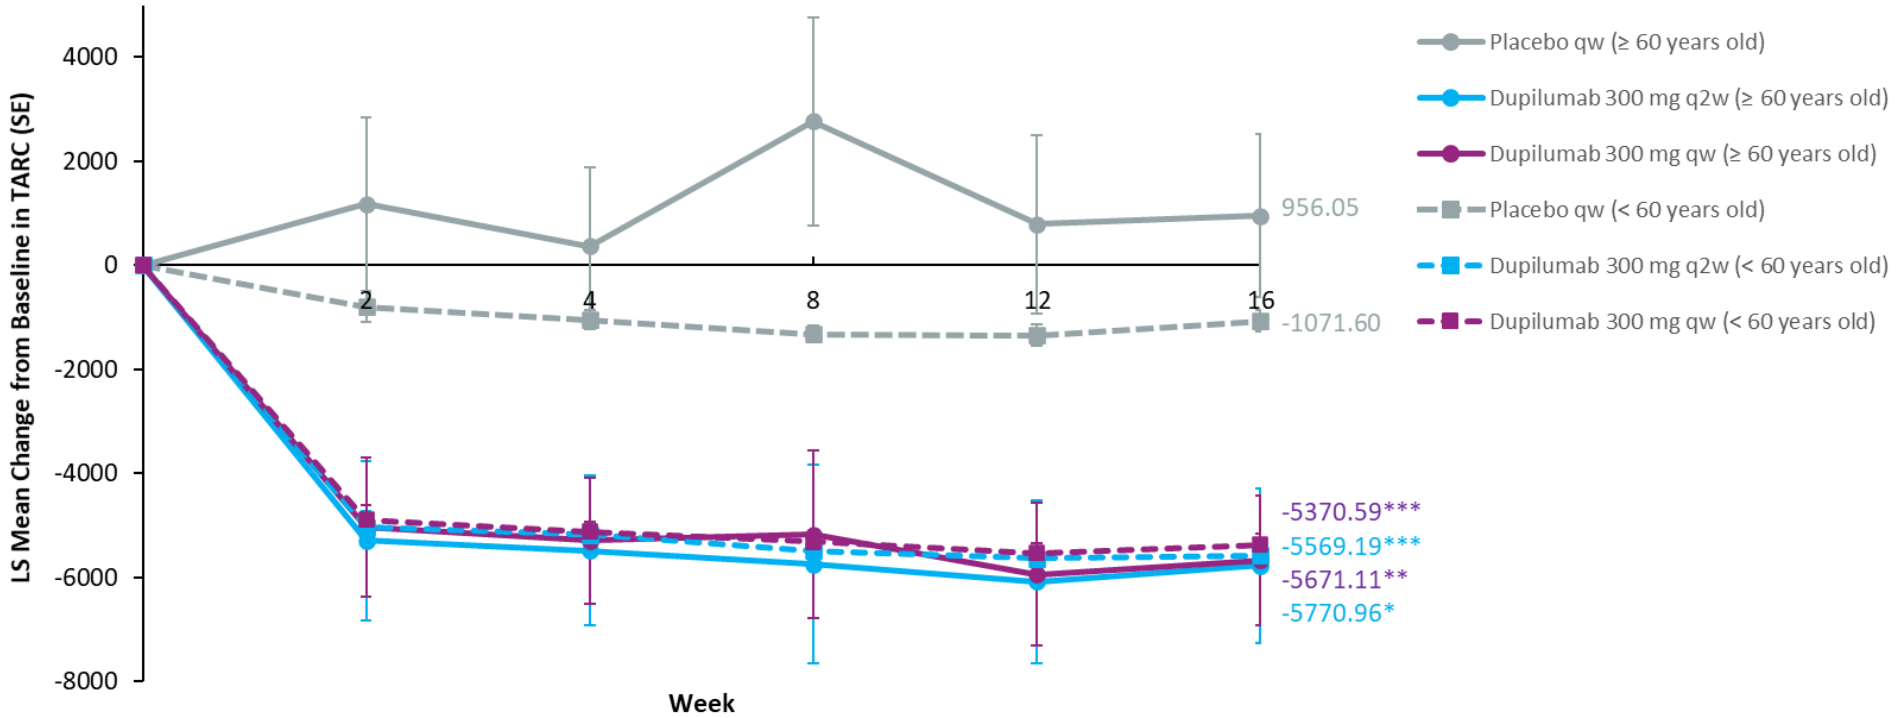

LS least squares, q2w every 2 weeks, qw every week, TARC thymus and activation-regulated chemokine. \* $P < 0.05$ ; \*\* $P < 0.001$ ; \*\*\* $P < 0.0001$

**Fig. S3** LS mean change from baseline in total IgE. Patients aged < 60 years treated with dupilumab 300 mg qw or q2w achieved a greater LS mean change from baseline in total IgE from week 4 through week 16 vs placebo ( $P < 0.0001$ ). Patients aged  $\geq 60$  years treated with dupilumab 300 mg qw or q2w achieved a greater LS mean change from baseline in total IgE from week 4 vs placebo ( $P < 0.05$ ), and with dupilumab qw or q2w from week 12 through week 16 vs placebo ( $P < 0.001$ ).

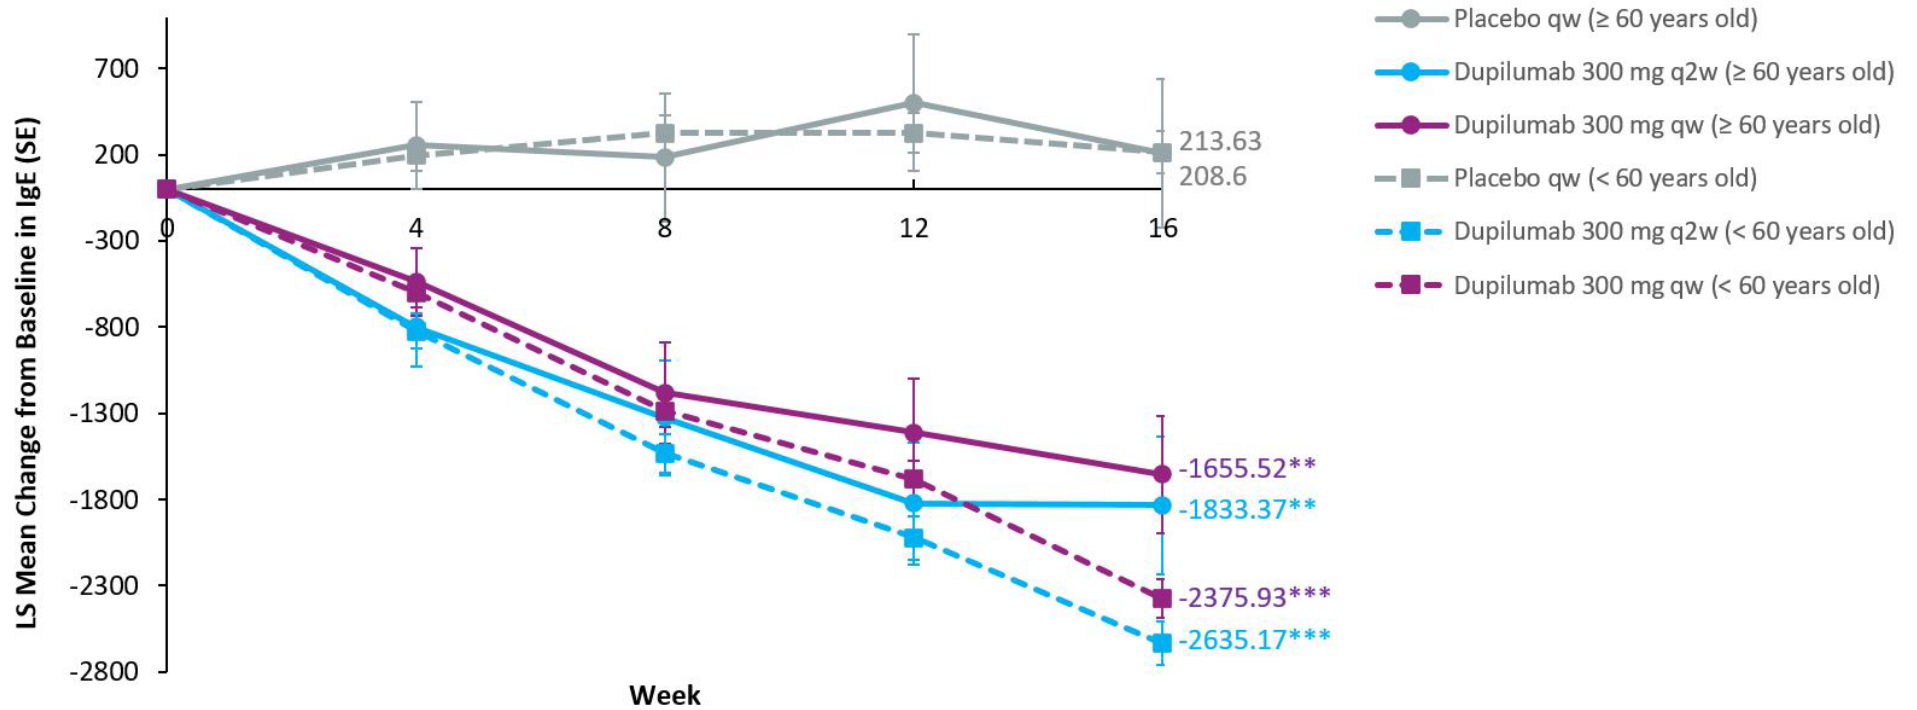

IgE immunoglobulin E, LS least squares, q2w every 2 weeks, qw every week. \* $P < 0.05$ ; \*\* $P < 0.001$ ; \*\*\* $P < 0.0001$
